# Supplementary material for: The pharmalogical reactivation of p53 function improves breast tumor cell lysis by granzyme B and NK cells through induction of autophagy
Source: PubMed Central journal article supplement (PMC6754511; doi:10.1038/s41419-019-1950-1), 2019-09-20
Supplement: 41419_2019_1950_MOESM1_ESM.pdf [file 41419_2019_1950_MOESM1_ESM.pdf]

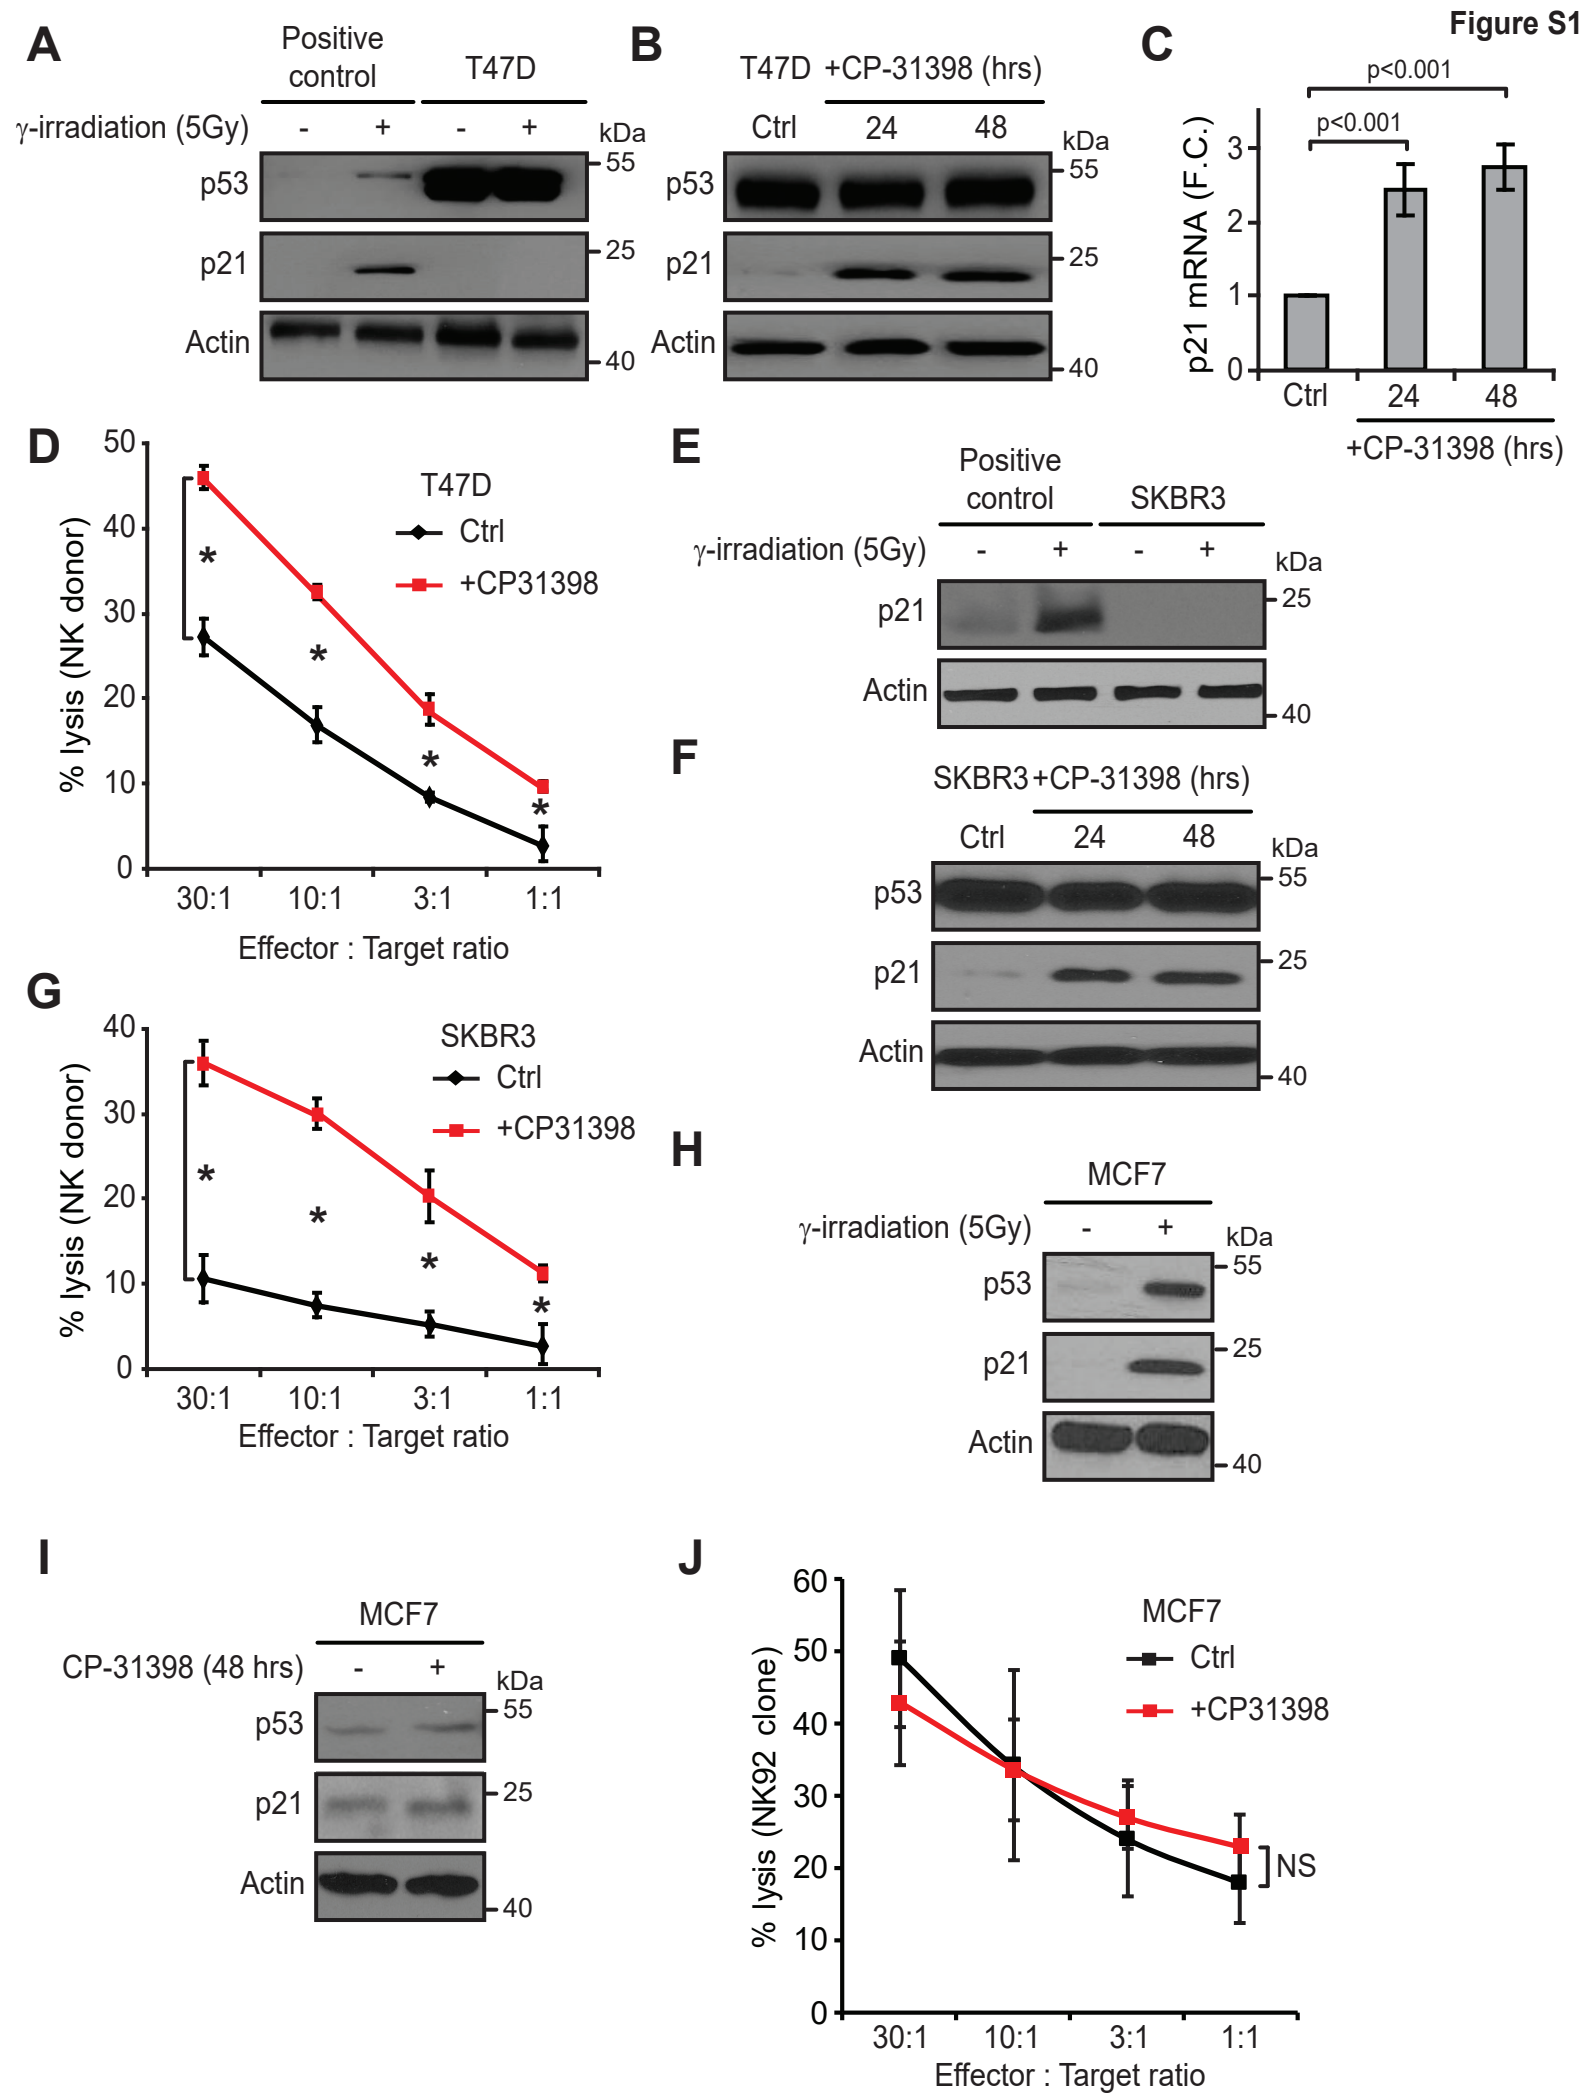

**Figure S1. The reactivation of p53 transcriptional activity by CP-31398 increases T47D and SKBR3 breast cancer cell susceptibility to NK-mediated lysis**

(A,E) T47D and SKBR3 cells express high level of mutated p53 (p53<sup>L194F</sup> and p53<sup>R175H</sup> respectively) lacking transcriptional activity as shown by the absence of p53-dependent transactivation of its target gene p21 even after  $\gamma$ -irradiation. (B-C,F) 24-48 hrs treatment with CP-31398 reactivates p53 transcriptional activity in T47D and SKBR3 cells as shown by induction of p21 expression at mRNA (C) and protein (B-F) levels. (D,G) CP-31398 treatment (48 hrs) increases T47D and SKBR3 cells susceptibility to NK-mediated lysis. <sup>51</sup>Cr release assays using NK cells isolated from a healthy donor co-cultured with target cells at different E:T ratios are shown. (H-J) MCF7 cells express a transcriptionally active wt p53 as shown by transactivation of its target gene p21 after  $\gamma$ -irradiation (H). CP-31398 did not induce p21 expression in these cells (I) neither potentiate their lysis by NK cells (NK92) (J). Data are representative of three independent experiments (A-B, E-F, H-I) or are the mean  $\pm$  s.d. of three (D, G, J) or five (C) independent experiments. The p values (C-D, G, J) were determined by unpaired two-tailed Student t test. NS: non-significant. \**P* < 0.05.

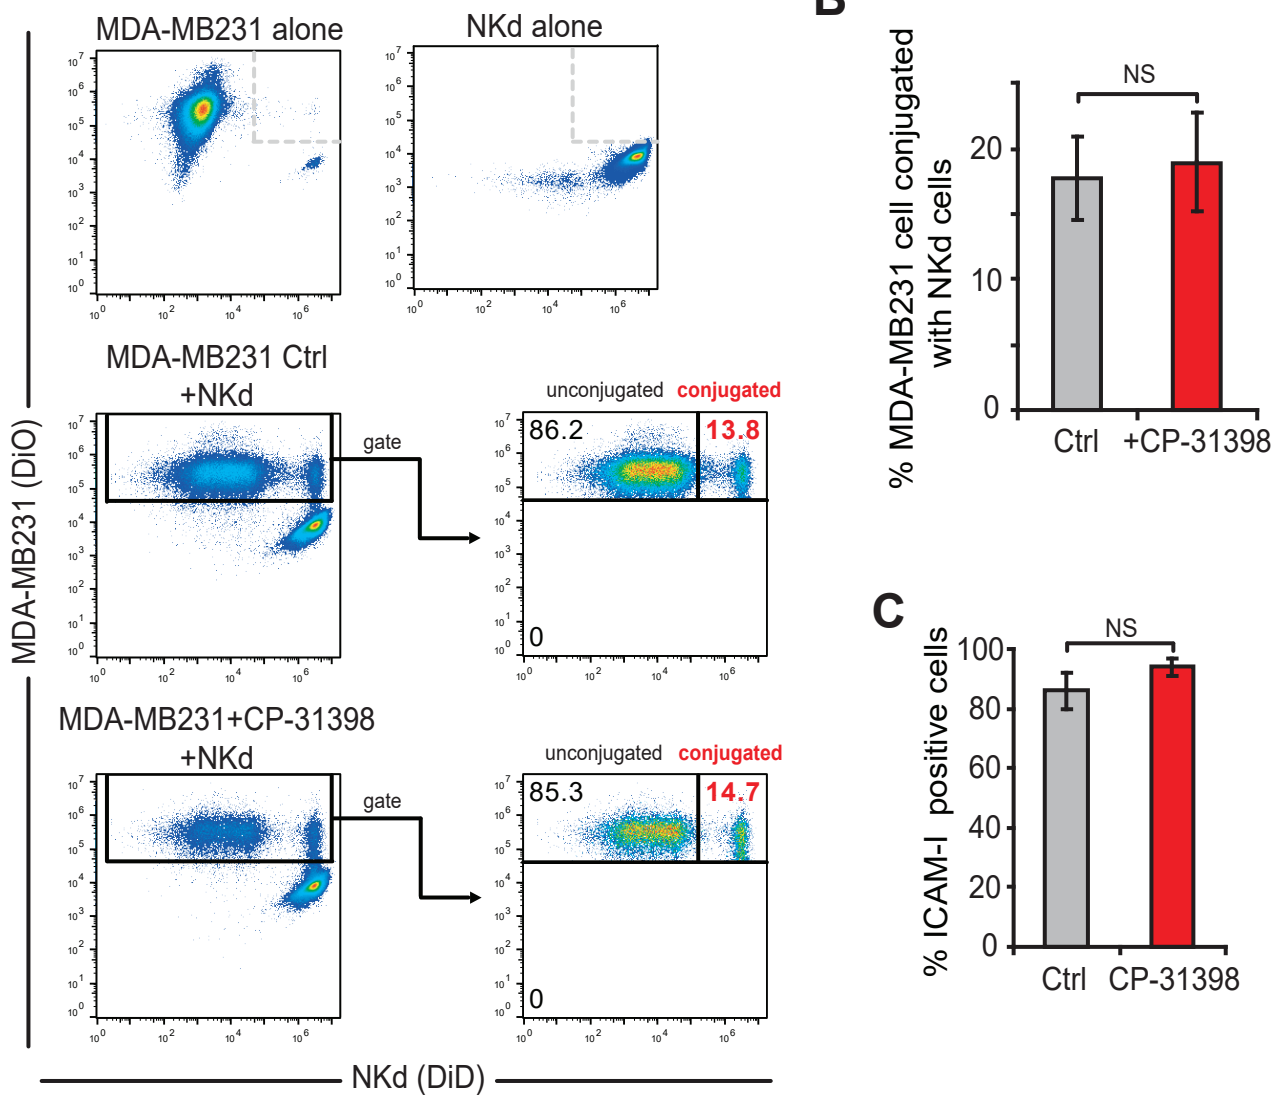**B**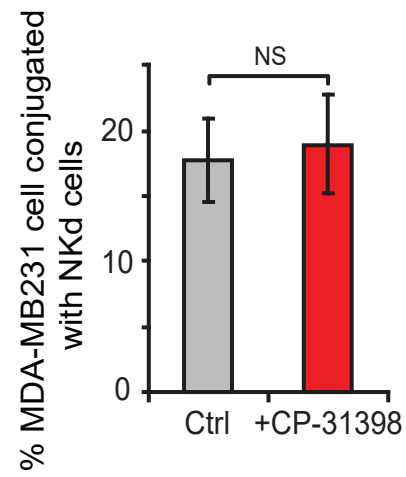**C**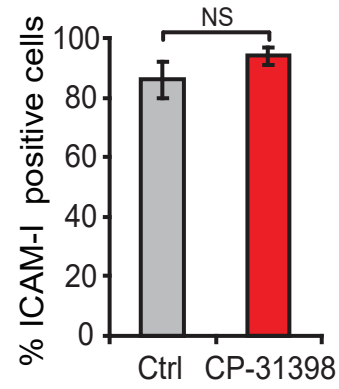**D**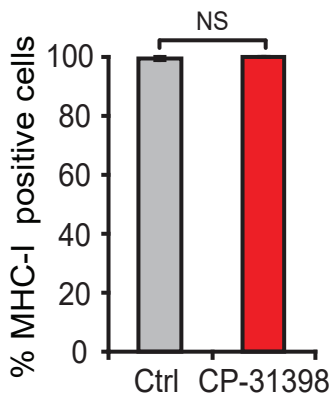**E**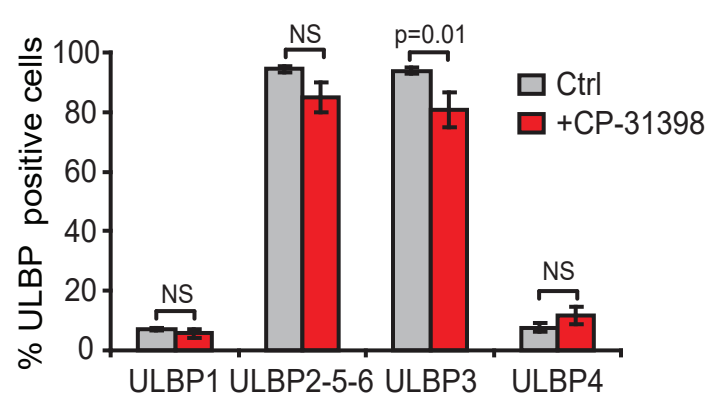**F**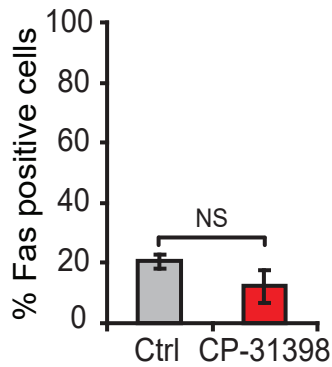**G**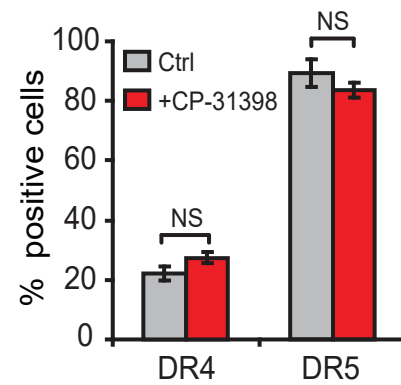

**Figure S2. The reactivation of p53 transcriptional activity by CP-31398 does not improve the formation of conjugates between target and NK cells or increase death receptor expression**

(A-B) MDA-MB231 cells  $\pm$  CP-31398 (48 hrs) stained with the lipophilic dyes DiO were incubated with NKd effector cells, stained with the lipophilic dyes DiD, at the effector:target ratio of 3:1 during 20 min before measuring immune conjugates formation by flow cytometry. Isolated MDA-MB231 and NKd were used as control to identify the two separated populations. The percentage of MDA-MB231 cells conjugated with NKd cells was calculated by gating on target cells and on measuring the percentage of DiO/DiD double positive population representing the immune conjugates, and indicated in red. Representative flow cytometry dot plots (A) and mean  $\pm$  s.d. of percentage MDA-MB231 cells conjugated with NKd cells (B) from three independent experiments are shown. (C-G) ICAM-1, MHC-class I, ULBPs, FAS, DR4 and DR5 expression is not modulated by CP-31398 treatment of MDA-MB231 cells. Data (C-G) are the mean  $\pm$  s.d. from three independent flow cytometry experiments. The p values (B-G) were determined by unpaired two-tailed Student t test. NS: non-significant.



**A**

Ctrl

+CP-31398 (48 hrs)

MDA-MB231 (Tomato-LC3)

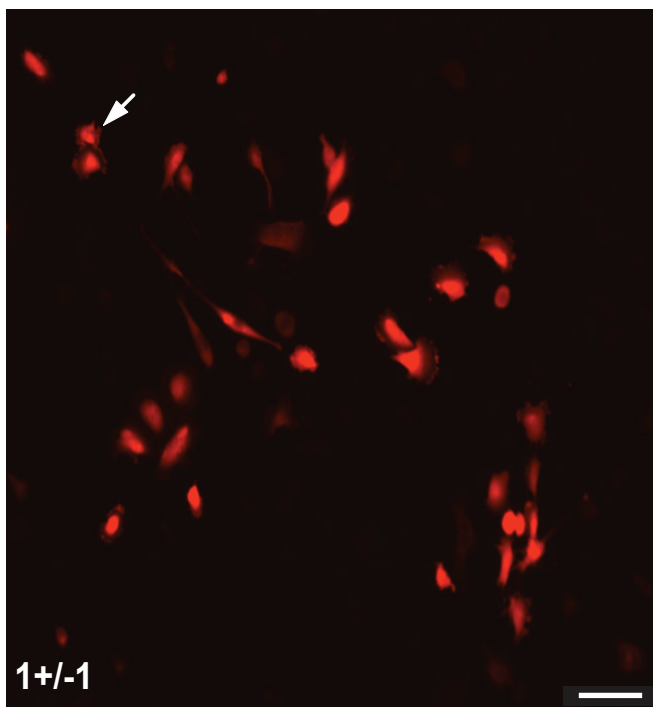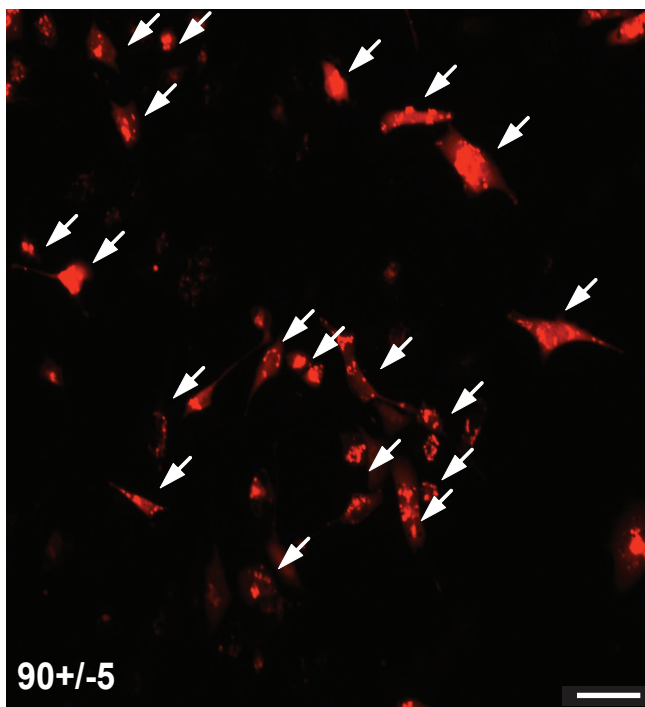**B**

Ctrl

+CP-31398 (48 hrs)

+CQ

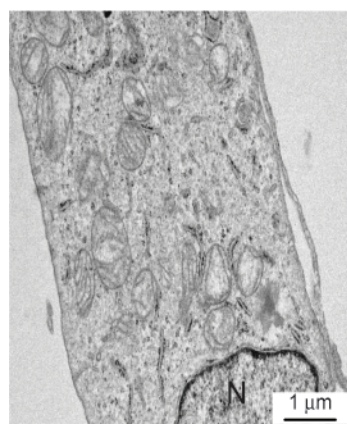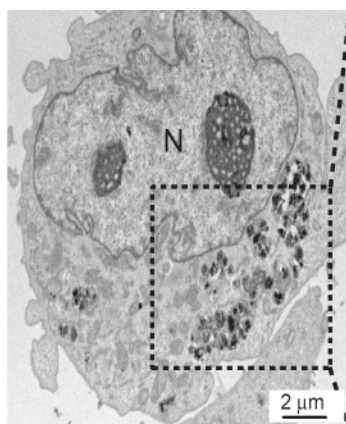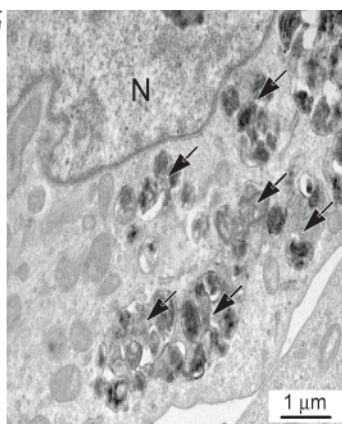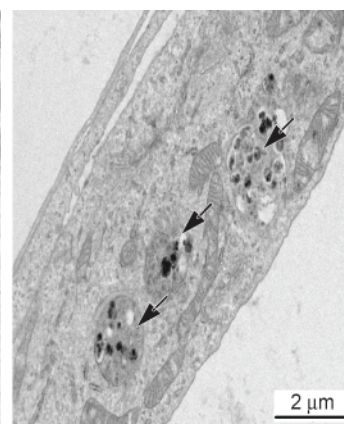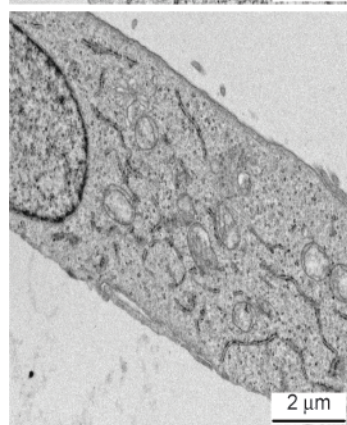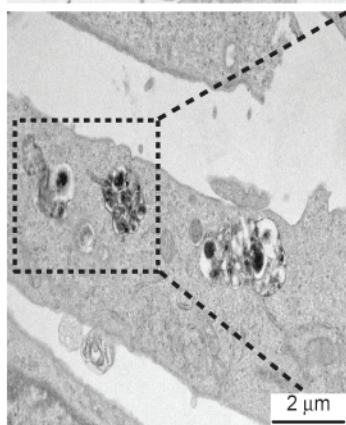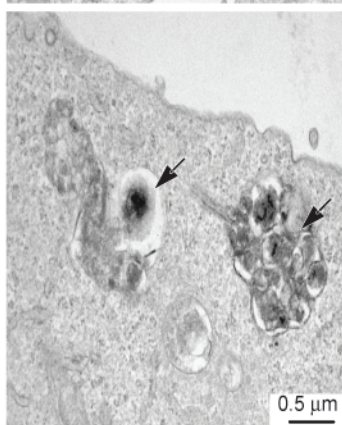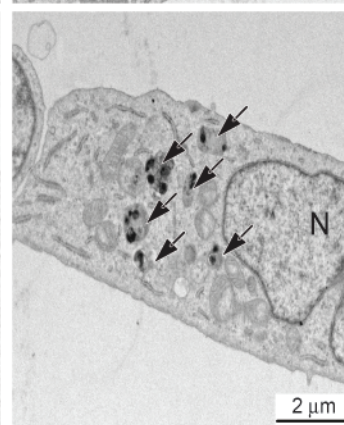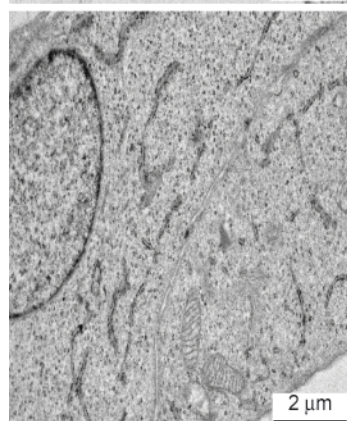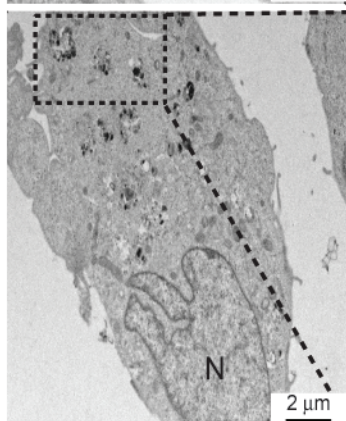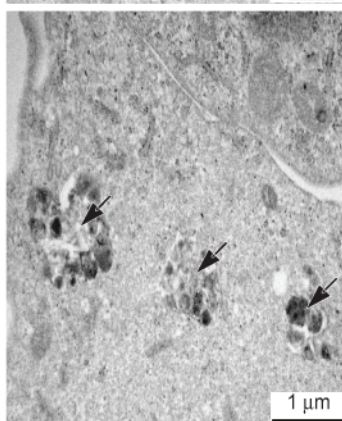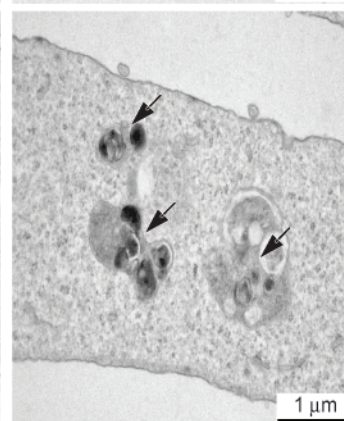

MDA-MB231

**Figure S3. CP-31398 induces the formation of autophagosomes in MDA-MB231 cells**

(A) Tomato-LC3 fusion protein is mostly diffuse throughout the cytoplasm of untreated cells, while punctate staining, representing autophagosomes, are observed when MDA-MB231 cells are treated with CP-31398 (48 hrs). Scale bars: 100  $\mu$ m. White arrows indicates cells with autophagosomes. Numbers indicate the percentage cell with autophagosomes (mean  $\pm$  s.d. from three independent experiments). (B) Effect of CP-31398 or chloroquine (CQ) on autophagosomes formation observed by electron microscopy. N: nucleus; black arrows: autophagosomes. Data are (A-B) representative of three independent experiments

**A**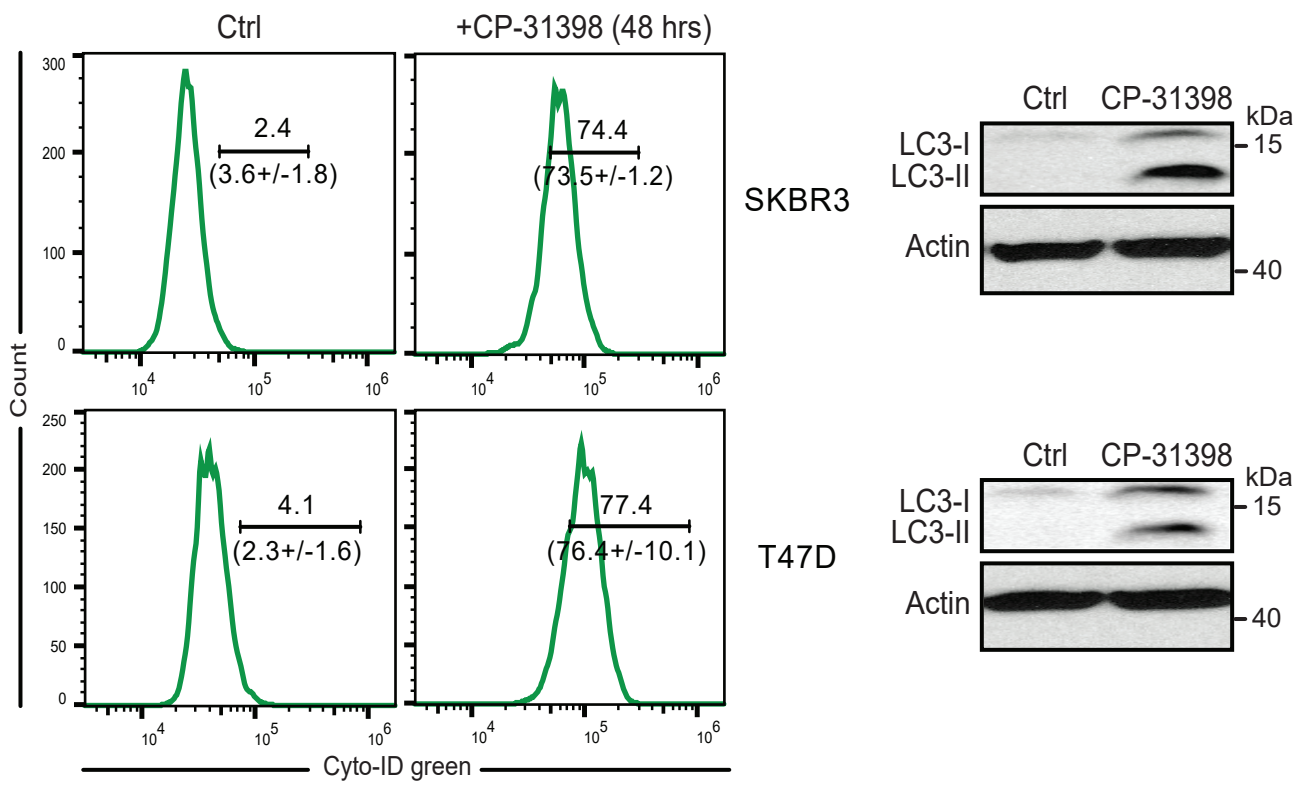**B**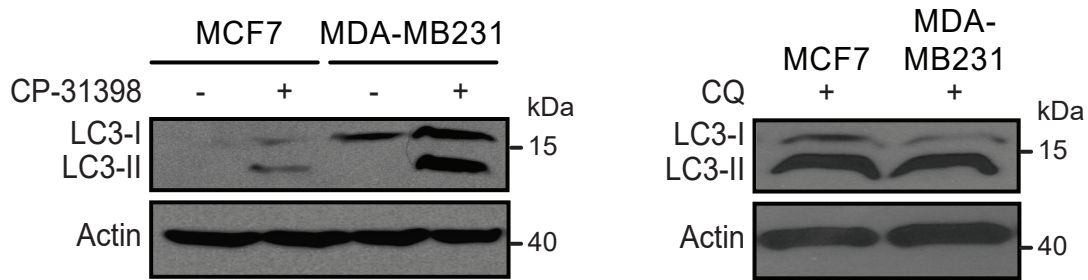

**Figure S4. CP-31398 triggers autophagy in SKBR3 and T47D breast tumor cells**

(A) CP-31398 induces autophagy in p53-mutated T47D and SKBR3 cells measured by flow cytometry using CYTO-ID green or by western blot to quantify LC3-II. (B) Western blot quantification of LC3-II induction in wtp53 MCF7 cells in response to CP-31398 treatment (48 hrs), compared to MDA-MB231 cells (left panel). Chloroquine (CQ) was used as positive control (right panel). Data are representative of three independent experiments (A-B) or are the mean  $\pm$  s.d. of three independent experiments (A; left panel).

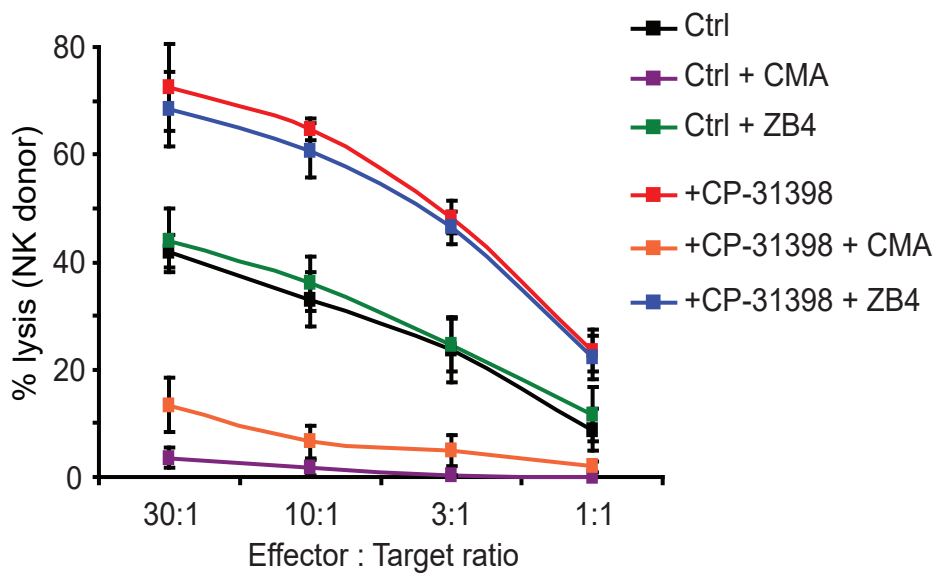

**Figure S5. MDA-MB231 target cells are killed by NK cells through the Perforin/Granzymes pathway**

MDA-MB231 lysis by NK cells is dependent on Perforin/Granzymes pathway, indistinctly of CP-31398 treatment, as shown by the almost complete inhibition of NK-mediated lysis in presence of the Ca<sup>2+</sup> chelator concanamycin A (CMA) (that inhibits cytotoxic granules exocytosis). The Fas blocking antibody ZB4 was used as control. Data are the mean  $\pm$  s.d. of two independent <sup>51</sup>Cr release assay using NK cells isolated from a healthy donor co-cultured with target cells at different E:T ratios.



A

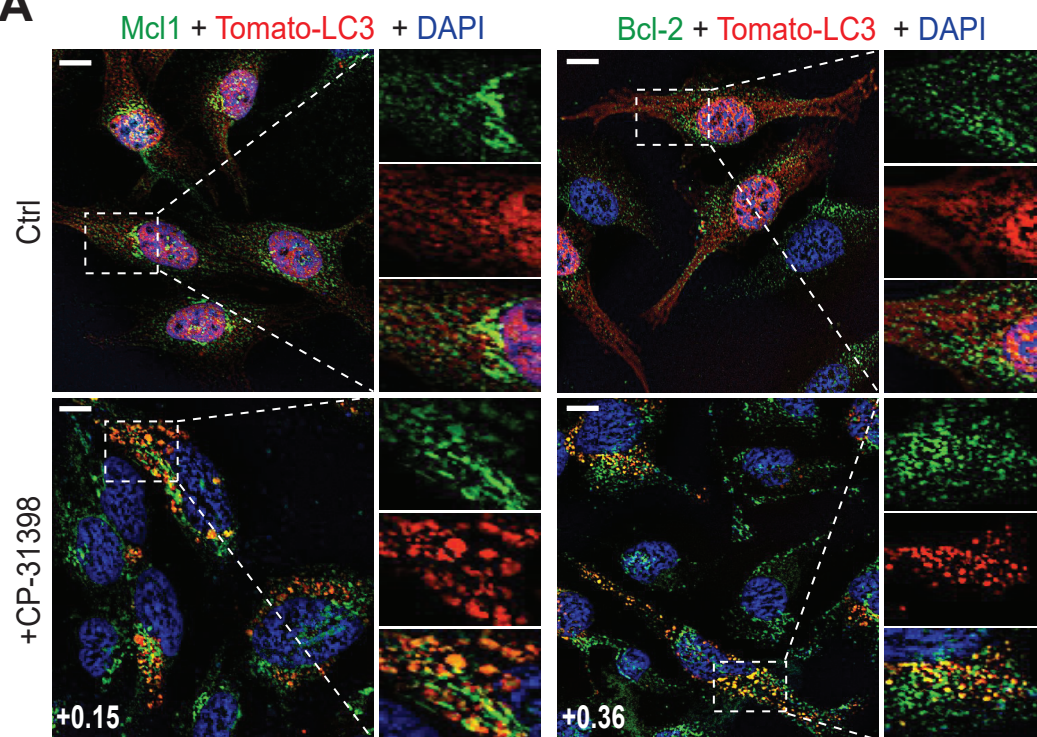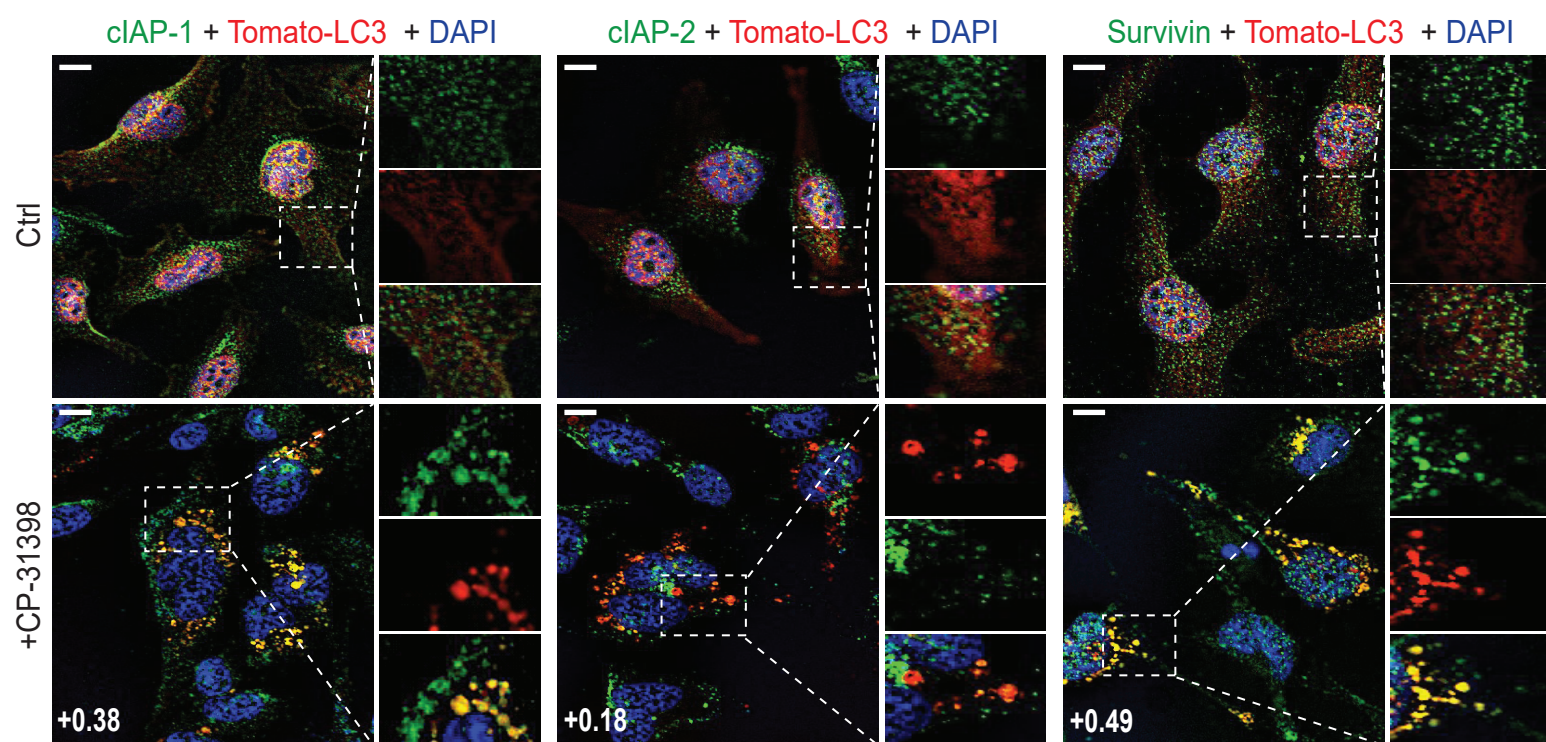

B

| Colocalization (+CP-31398) | Pearson's correlation coefficient R(r)<br>(mean +/- s.d.) |
|----------------------------|-----------------------------------------------------------|
| Tomato-LC3 /Mcl1           | + 0.10 +/- 0.05                                           |
| TomatoLC3 /Bcl-2           | + 0.40 +/- 0.10                                           |
| Tomato-LC3 /cIAP-1         | + 0.33 +/- 0.19                                           |
| Tomato-LC3 /cIAP-2         | + 0.16 +/- 0.12                                           |
| Tomato-LC3 /Survivin       | + 0.38+/- 0.11                                            |

**Figure S6. CP-31398-induced autophagosomes can contain other anti-apoptotic proteins**

(A) CP-31398-induced Tomato-LC3<sup>+</sup> autophagosomes do not contain the anti-apoptotic proteins Mcl-1 and cIAP-2, but can contain Bcl-2, cIAP-1 and Survivin at a lower level than Bcl-X<sub>L</sub> and XIAP. Scale bars: 20 μm. Data are representative of three independent fluorescence microscopy experiments. (B) The colocalization between CP-31398-induced Tomato-LC3<sup>+</sup> autophagosomes and the indicated proteins (stained in green) was measured and displayed as a pearson's correlation coefficient R(r) (also indicated as a number in (A)). The data (mean ± s.d.) obtained from 20 images from three independent experiments are shown.



A

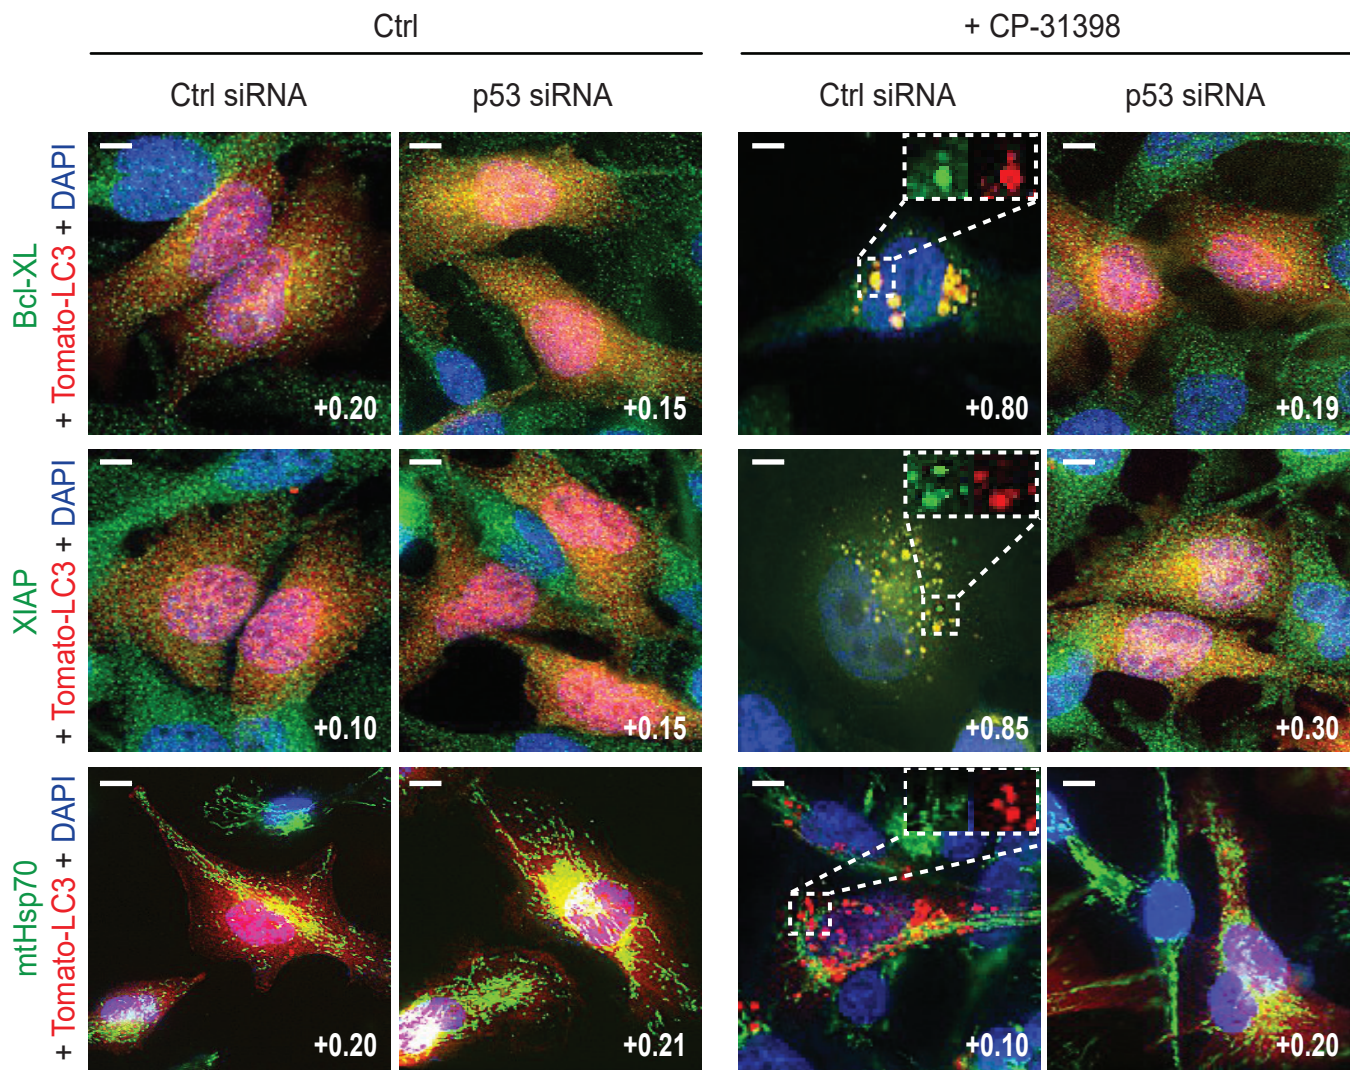

B

| Number of Tomato-LC3 <sup>+</sup> autophagosomes per cell (mean $\pm$ SD) |                |      |
|---------------------------------------------------------------------------|----------------|------|
| Ctrl siRNA                                                                | 0.2 $\pm$ 0.2  | N.S. |
| P53 siRNA                                                                 | 1.3 $\pm$ 0.3  |      |
| Ctrl siRNA +CP-31398                                                      | 18.3 $\pm$ 8.9 | *    |
| P53 siRNA +CP-31398                                                       | 3.9 $\pm$ 2.5  |      |

C

| Colocalization (+CP-31398) |            | Pearson's correlation coefficient R(r) (mean $\pm$ s.d.) |      |
|----------------------------|------------|----------------------------------------------------------|------|
| Tomato-LC3/Bcl-XL          | Ctrl siRNA | + 0.85 $\pm$ 0.05                                        | *    |
|                            | p53 siRNA  | + 0.28 $\pm$ 0.10                                        |      |
| Tomato-LC3/XIAP            | Ctrl siRNA | + 0.75 $\pm$ 0.15                                        | *    |
|                            | p53 siRNA  | + 0.23 $\pm$ 0.13                                        |      |
| Tomato-LC3/mtHsp70         | Ctrl siRNA | + 0.25 $\pm$ 0.15                                        | N.S. |
|                            | p53 siRNA  | + 0.27 $\pm$ 0.12                                        |      |

**Figure S7. CP-31398 induced sequestration of Bcl-X<sub>L</sub> and XIAP in autophagosomes is inhibited in p53 siRNA treated cells**

(A) CP-31398-induced Tomato-LC3<sup>+</sup> autophagosomes contains the anti-apoptotic proteins Bcl-X<sub>L</sub> and XIAP, but not the mitochondrial marker mtHsp70, in control siRNA-treated cells. After mutant p53 knockdown using siRNA, autophagosomes are mostly undetectable in response to CP-31398 and Bcl-X<sub>L</sub> and XIAP are no longer associated with LC3<sup>+</sup> structures. Scale bars: 20 μm. Data are representative of three independent fluorescence microscopy experiments. (B) The inhibition of p53 expression using siRNA strongly decrease the number of LC3-Tomato<sup>+</sup> autophagosomes formed after CP-31398 treatment, counted from microscopy images (100 cells for each conditions) (C) The colocalization between CP-31398-induced Tomato-LC3<sup>+</sup> autophagosomes and the indicated proteins (stained in green) was measured and displayed as a pearson's correlation coefficient R(r) (also indicated as a number in (A)). The data (mean ± s.d.) obtained from 20 images containing at least 5 cells from three independent experiments are shown. Bcl-X<sub>L</sub> and XIAP staining (R(r) > 0.6) is strongly associated with Tomato-LC3<sup>+</sup> autophagosomes. Data are representative of three independent experiments (A) or are the mean ± s.d. of three independent experiments (B-C). The p values (B-C) were determined by unpaired two-tailed Student t test. \**P* < 0.05.

**A**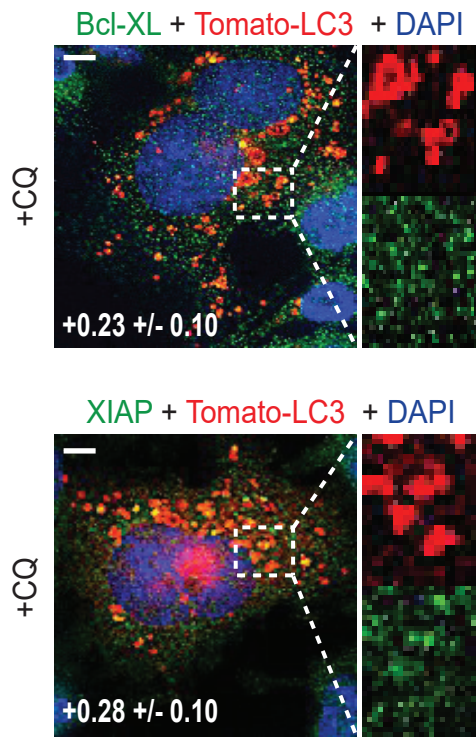**B**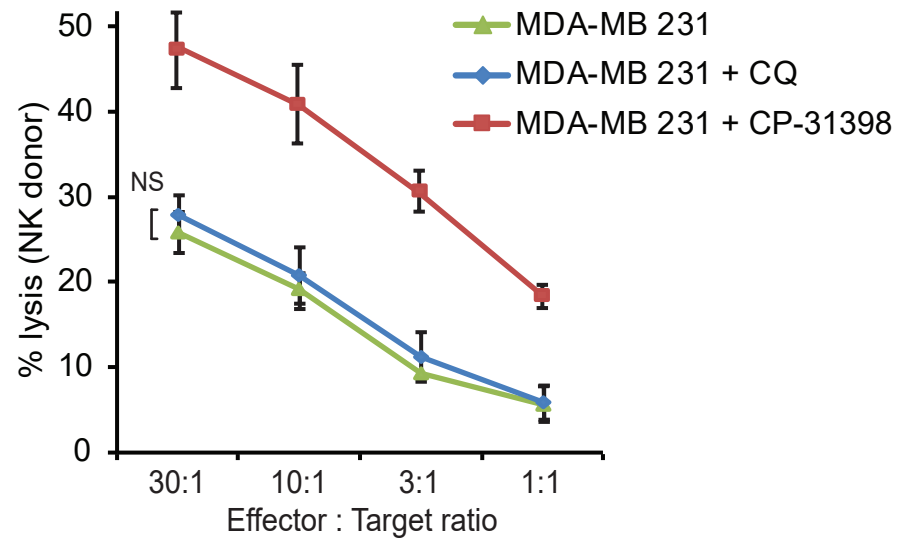

**Figure S8. Chloroquine-induced autophagosomes do not sequester Bcl-X<sub>L</sub> and XIAP and do not increase MDA-MB231 cell susceptibility to NK-mediated lysis**

(A) Chloroquine (CQ)-induced Tomato-LC3<sup>+</sup> autophagosomes do not contain the anti-apoptotic proteins Bcl-X<sub>L</sub> and XIAP. Scale bars: 20 μm. Data are representative of two independent fluorescence microscopy experiments. The colocalization between CQ-induced Tomato-LC3<sup>+</sup> autophagosomes and the indicated proteins (stained in green) was measured and displayed as a Pearson's correlation coefficient R(r) (mean ± s.d. of two independent experiments). (B) CQ pre-treatment (16 hrs) does not increase MDA-MB231 cell susceptibility to NK-mediated lysis. <sup>51</sup>Cr release assay using NK cells isolated from a healthy donor co-cultured with target cells at different E:T ratios is shown. Data are the mean ± s.d. of two independent experiments performed in triplicate. The p values (NS: non-significant) were determined by unpaired two-tailed Student t test.

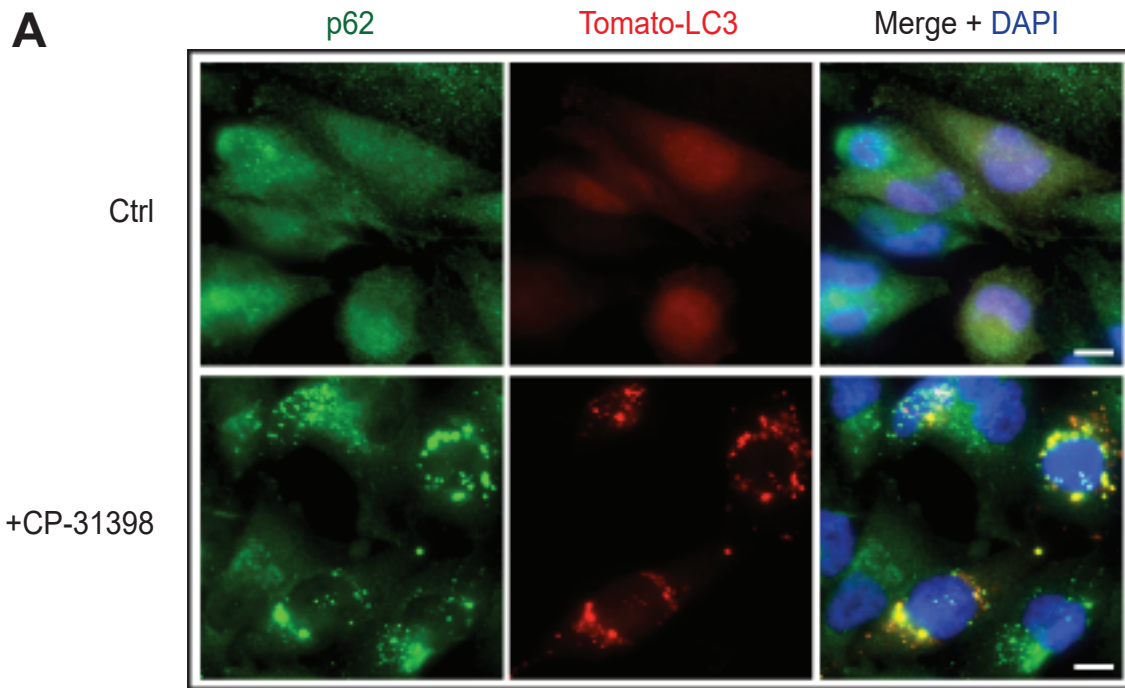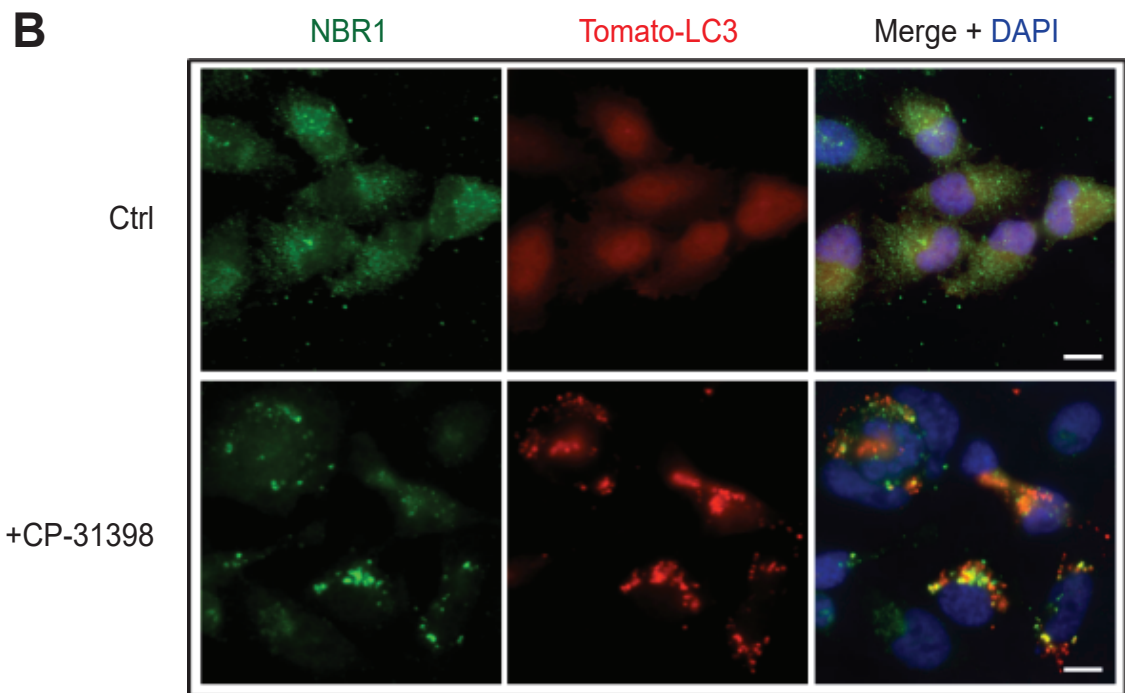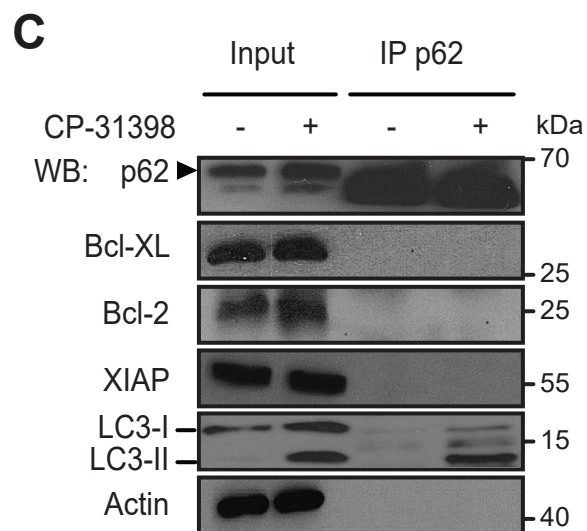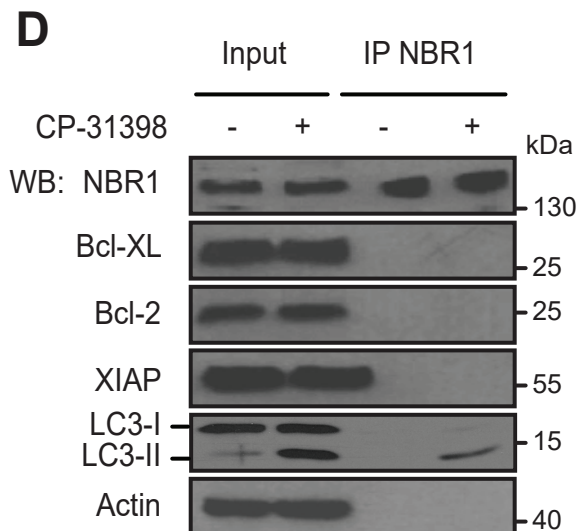

**Figure S9. The autophagosomal sequestration of Bcl-X<sub>L</sub>, Bcl-2 and XIAP in response to CP-31398 is independent of p62 and NBR1**

**(A-B)** P62 and NBR1 relocalize to LC3-Tomato<sup>+</sup> autophagosomes formed in response to CP-31398 treatment (48 hrs). Representative fluorescence microscopy images from two independent experiments are displayed. Scale bars: 10 μm. **(C-D)** P62 or NBR1 do not interact with Bcl-X<sub>L</sub>, Bcl-2 and XIAP in response to CP-31398. P62 and NBR1 were independently immuno-precipitated from MDA-MB231 cells after 24 hrs treatment with CP-31398 before western-blot analysis of Bcl-X<sub>L</sub>, Bcl-2 and XIAP. Immunoblotting for LC3-II was used as a positive control. Data are representative of three independent experiments.
